# Supplementary material for: Engineering the methylerythritol phosphate pathway in cyanobacteria for photosynthetic isoprene production from CO2
Source: Royal Society of Chemistry journal article supplement (doi:10.1039/c5ee03102h), 2016-01-01
Supplement: c5ee03102h1.pdf [file c5ee03102h1.pdf]

## **Supplementary Information for “Engineering the methylerythritol phosphate pathway in cyanobacteria for photosynthetic isoprene production from CO<sub>2</sub>”**

**Gao et al.**

Contents:

Table S1. Isoprene production from 20 engineered *S. elongatus* strains expressing various plant *ispS* genes.

Table S2. Intracellular concentrations of MEP pathway intermediates quantified by LC-MS.

Table S3. Kinetics of decreases in the unlabeled fraction of MEP pathway intermediates after switching to media with [3-<sup>13</sup>C]pyruvate.

Table S4. Photosynthetic carbon fluxes towards biomass synthesis and isoprene production at different growth stages of long-term cultivation.

Table S5. Comparison of productivity of various biochemicals from CO<sub>2</sub> in cyanobacteria.

Table S6. Strains and plasmids.

Table S7. Oligonucleotides used in this study.

Table S8. Extracellular concentrations of metabolites quantified by GC-MS

Fig. S1. Effect of treatment with DBMIB and DCMU on isoprene production of strains SE32 and SE52.

Fig. S2. Intracellular glycogen contents in *S. elongatus* wild type, SE52, and SE53 strains during long-term continuous production of isoprene.

References for Supplementary Materials.

**Table S1.** Isoprene production from 20 engineered *S. elongatus* strains expressing various plant *ispS* genes.

| Strain | Promoter           | Source organism for <i>ispS</i> | Codon-optimized* | Isoprene ( $\mu\text{g L}^{-1}$ ) <sup>†</sup> |
|--------|--------------------|---------------------------------|------------------|------------------------------------------------|
| SE01   | $P_{\text{psbA2}}$ | <i>Pueraria montana</i>         | +                | $59 \pm 2$                                     |
| SE02   | $P_{\text{psbA2}}$ | <i>Populus trichocarpa</i>      | –                | $30 \pm 2$                                     |
| SE03   | $P_{\text{psbA2}}$ | <i>Populus deltoides</i>        | –                | $26 \pm 1$                                     |
| SE04   | $P_{\text{psbA2}}$ | <i>Eucalyptus globulus</i>      | –                | $263 \pm 13$                                   |
| SE05   | $P_{\text{psbA2}}$ | <i>Populus alba</i>             | –                | $294 \pm 7$                                    |
| SE06   | $P_{\text{psbA2}}$ | <i>Populus canescens</i>        | –                | $273 \pm 7$                                    |
| SE16   | $P_{\text{cpc}}$   | <i>Pueraria montana</i>         | +                | $243 \pm 17$                                   |
| SE17   | $P_{\text{cpc}}$   | <i>Populus alba</i>             | –                | $1084 \pm 52$                                  |
| SE10   | $P_{\text{cpc}}$   | <i>Populus alba</i>             | +                | $1176 \pm 34$                                  |
| SE18   | $P_{\text{cpc}}$   | <i>Populus canescens</i>        | –                | $935 \pm 58$                                   |
| SE20   | $P_{\text{cpc}}$   | <i>Populus canescens</i>        | +                | $1174 \pm 45$                                  |
| SE19   | $P_{\text{cpc}}$   | <i>Eucalyptus globulus</i>      | –                | $3462 \pm 378$                                 |
| SE11   | $P_{\text{cpc}}$   | <i>Eucalyptus globulus</i>      | +                | $3063 \pm 195$                                 |
| SE09   | $P_{\text{trc}}$   | <i>Pueraria montana</i>         | +                | $283 \pm 15$                                   |
| SE07   | $P_{\text{trc}}$   | <i>Populus alba</i>             | –                | $988 \pm 21$                                   |
| SE12   | $P_{\text{trc}}$   | <i>Populus alba</i>             | +                | $1365 \pm 279$                                 |
| SE14   | $P_{\text{trc}}$   | <i>Populus canescens</i>        | –                | $1797 \pm 545$                                 |
| SE15   | $P_{\text{trc}}$   | <i>Populus canescens</i>        | +                | $4357 \pm 381$                                 |
| SE08   | $P_{\text{trc}}$   | <i>Eucalyptus globulus</i>      | –                | $5914 \pm 291$                                 |
| SE13   | $P_{\text{trc}}$   | <i>Eucalyptus globulus</i>      | +                | $7733 \pm 28$                                  |

\*Codon-optimized sequences are indicated by (+) and native sequences are indicated by (–).

<sup>†</sup>Cells were grown in shake flask cultures for 72 h. IPTG (1 mM) was added to cultures at OD<sub>730</sub> of about 0.5 if needed. Errors indicate s.d. ( $n = 3$ ).

**Table S2.** Intracellular concentrations of MEP pathway intermediates quantified by LC-MS.

| Strain | Intracellular concentration ( $\mu\text{M}$ ) <sup>*</sup> |                |               |                 |                 |
|--------|------------------------------------------------------------|----------------|---------------|-----------------|-----------------|
|        | DXP                                                        | MEP            | CDP-ME        | MEcPP           | HMBPP           |
| WT     | $23.5 \pm 2.8$                                             | $3.7 \pm 0.2$  | $0.2 \pm 0.1$ | $30.1 \pm 4.6$  | $1.9 \pm 0.1$   |
| SE13   | $20.7 \pm 0.5$                                             | $3.6 \pm 0.1$  | $0.3 \pm 0.1$ | $1878 \pm 227$  | $185.6 \pm 5.3$ |
| SE23   | $55.9 \pm 1.4$                                             | $39.5 \pm 3.6$ | $0.9 \pm 0.2$ | $12127 \pm 606$ | $1677 \pm 180$  |

\*Errors indicate s.d. ( $n = 3$ ).

**Table S3.** Kinetics of decreases in the unlabeled fraction of MEP pathway intermediates after switching to media with [3-<sup>13</sup>C]pyruvate.

| Time (min) | DXP    |        | MEP    |        | CDP-ME |        | MEcPP  |        | HMBPP  |        |
|------------|--------|--------|--------|--------|--------|--------|--------|--------|--------|--------|
|            | SE32   | SE52   |
| 0          | 1.0000 | 1.0000 | 1.0000 | 1.0000 | 1.0000 | 1.0000 | 1.0000 | 1.0000 | 1.0000 | 1.0000 |
| 1          | 0.9635 | 0.9414 | 0.9992 | 0.9927 | 0.9917 | 0.9872 | 0.9998 | 0.9691 | 0.9913 | 0.9385 |
| 2          | 0.9364 | 0.9142 | 0.9836 | 0.9537 | 0.9831 | 0.9630 | 0.9977 | 0.9156 | 0.9890 | 0.9107 |
| 4          | 0.9168 | 0.9042 | 0.9891 | 0.9627 | 0.9756 | 0.9677 | 0.9913 | 0.9201 | 0.9652 | 0.9234 |
| 8          | 0.9052 | 0.8886 | 0.9747 | 0.9462 | 0.9756 | 0.9604 | 0.9850 | 0.9150 | 0.9478 | 0.9314 |

**Table S4.** Photosynthetic carbon fluxes towards biomass synthesis and isoprene production at different growth stages of long-term cultivation.

| Strain | Time (d) | Biomass-C ( $\mu\text{mol g}^{-1} \text{h}^{-1}$ ) | Isoprene-C ( $\mu\text{mol g}^{-1} \text{h}^{-1}$ ) | Isoprene-C Percentage (%) |
|--------|----------|----------------------------------------------------|-----------------------------------------------------|---------------------------|
| SE52   | 0–3      | 889.3                                              | 188.5                                               | 17.5                      |
|        | 3–21     | 24.2                                               | 45.9                                                | 65.6                      |
| SE54   | 0–3      | 847.4                                              | 147.3                                               | 14.8                      |
|        | 3–21     | 72.5                                               | 26.2                                                | 26.5                      |

**Table S5.** Comparison of productivity of various biochemicals from CO<sub>2</sub> in cyanobacteria.

| Chemical               | Host                            | Productivity ( $\mu\text{g L}^{-1} \text{h}^{-1}$ ) | Inducer | Ref.*            |
|------------------------|---------------------------------|-----------------------------------------------------|---------|------------------|
| <b>Terpenoids</b>      |                                 |                                                     |         |                  |
| $\beta$ -Caryophyllene | <i>Synechocystis sp.</i> 6803   | 0.3                                                 | –       | 1                |
| $\beta$ -Phellandrene  | <i>Synechocystis sp.</i> 6803   | 1.0                                                 | –       | 2                |
| Farnesene              | <i>Anabaena sp.</i> 7120        | 1.29                                                | –       | 3                |
| $\alpha$ -bisabolene   | <i>Synechococcus sp.</i> 7002   | 6.25                                                | –       | 4                |
| Limonene               | <i>Synechococcus sp.</i> 7002   | 41                                                  | –       | 4                |
| Isoprene               | <i>Synechocystis sp.</i> 6803   | 4                                                   | –       | 5                |
| <b>Isoprene</b>        | <b><i>S. elongatus</i> 7942</b> | <b>2489</b>                                         | –       | <b>This work</b> |
| <b>Isoprene</b>        | <b><i>S. elongatus</i> 7942</b> | <b>4260</b>                                         | +       | <b>This work</b> |
| <b>Others</b>          |                                 |                                                     |         |                  |
| Sucrose                | <i>S. elongatus</i> 7942        | 36100                                               | +       | 6                |
| 2,3-Butanediol         | <i>S. elongatus</i> 7942        | 9847                                                | +       | 7                |
| Ethanol                | <i>Synechocystis sp.</i> 6803   | 8833                                                | –       | 8                |
| Isobutyraldehyde       | <i>S. elongatus</i> 7942        | 6230                                                | +       | 9                |
| Fatty acids            | <i>Synechocystis sp.</i> 6803   | 4104                                                | –       | 10               |
| Ethylene               | <i>Synechocystis sp.</i> 6803   | 3800                                                | –       | 11               |
| Mannitol               | <i>Synechococcus sp.</i> 7002   | 3819                                                | –       | 12               |

|                    |                               |      |   |    |
|--------------------|-------------------------------|------|---|----|
| Isobutanol         | <i>S. elongatus</i> 7942      | 3125 | + | 9  |
| Lactic acid        | <i>Synechocystis</i> sp. 6803 | 2488 | + | 13 |
| 1-Butanol          | <i>S. elongatus</i> 7942      | 1403 | + | 14 |
| 3-Hydroxybutyrate  | <i>Synechocystis</i> sp. 6803 | 1058 | + | 15 |
| 2-Methyl-1-butanol | <i>S. elongatus</i> 7942      | 694  | + | 16 |
| 1,2-Propanediol    | <i>S. elongatus</i> 7942      | 625  | + | 17 |
| Acetone            | <i>Synechocystis</i> sp. 6803 | 375  | – | 18 |
| Isopropanol        | <i>S. elongatus</i> 7942      | 123  | + | 19 |
| Alka(e)nes         | <i>Synechocystis</i> sp. 6803 | 108  | + | 20 |
| Fatty alcohols     | <i>Synechocystis</i> sp. 6803 | 0.5  | – | 21 |

\*See the references in the last part of the Supplementary materials.

**Table S6.** Strains and plasmids.

| Strains                     | Genotype                                                              | Source    |
|-----------------------------|-----------------------------------------------------------------------|-----------|
| <i>S. elongatus</i> strains |                                                                       |           |
| PCC 7942                    | Wild type                                                             | ATCC      |
| SE01                        | $P_{psbA2}$ <i>ispS<sub>P.m.</sub></i> * integrated at NSII           | This work |
| SE02                        | $P_{psbA2}$ <i>ispS<sub>P.t.</sub></i> integrated at NSII             | This work |
| SE03                        | $P_{psbA2}$ <i>ispS<sub>P.d.</sub></i> integrated at NSII             | This work |
| SE04                        | $P_{psbA2}$ <i>ispS<sub>E.g.</sub></i> integrated at NSII             | This work |
| SE05                        | $P_{psbA2}$ <i>ispS<sub>P.a.</sub></i> integrated at NSII             | This work |
| SE06                        | $P_{psbA2}$ <i>ispS<sub>P.c.</sub></i> integrated at NSII             | This work |
| SE07                        | $P_{trc}$ <i>ispS<sub>P.a.</sub></i> integrated at NSII               | This work |
| SE08                        | $P_{trc}$ <i>ispS<sub>E.g.</sub></i> integrated at NSII               | This work |
| SE09                        | $P_{trc}$ <i>ispS<sub>P.m.</sub></i> * integrated at NSII             | This work |
| SE10                        | $P_{cpc}$ <i>ispS<sub>P.a.</sub></i> * integrated at NSII             | This work |
| SE11                        | $P_{cpc}$ <i>ispS<sub>E.g.</sub></i> * integrated at NSII             | This work |
| SE12                        | $P_{trc}$ <i>ispS<sub>P.a.</sub></i> * integrated at NSII             | This work |
| SE13                        | $P_{trc}$ <i>ispS<sub>E.g.</sub></i> * integrated at NSII             | This work |
| SE14                        | $P_{trc}$ <i>ispS<sub>P.c.</sub></i> integrated at NSII               | This work |
| SE15                        | $P_{trc}$ <i>ispS<sub>P.c.</sub></i> * integrated at NSII             | This work |
| SE16                        | $P_{cpc}$ <i>ispS<sub>P.m.</sub></i> * integrated at NSII             | This work |
| SE17                        | $P_{cpc}$ <i>ispS<sub>P.a.</sub></i> integrated at NSII               | This work |
| SE18                        | $P_{cpc}$ <i>ispS<sub>P.c.</sub></i> integrated at NSII               | This work |
| SE19                        | $P_{cpc}$ <i>ispS<sub>E.g.</sub></i> integrated at NSII               | This work |
| SE20                        | $P_{cpc}$ <i>ispS<sub>P.c.</sub></i> * integrated at NSII             | This work |
| SE07-His                    | $P_{trc}$ His-tagged <i>ispS<sub>P.a.</sub></i> integrated at NSII    | This work |
| SE08-His                    | $P_{trc}$ His-tagged <i>ispS<sub>E.g.</sub></i> integrated at NSII    | This work |
| SE09-His                    | $P_{trc}$ His-tagged <i>ispS<sub>P.m.</sub></i> * integrated at NSII  | This work |
| SE10-His                    | $P_{cpc}$ His-tagged <i>ispS<sub>P.a.</sub></i> * integrated at NSII  | This work |
| SE11-His                    | $P_{cpc}$ His-tagged <i>ispS<sub>E.g.</sub></i> * integrated at NSII  | This work |
| SE12-His                    | $P_{trc}$ His-tagged <i>ispS<sub>P.a.</sub></i> * integrated at NSII  | This work |
| SE13-His                    | $P_{trc}$ His- tagged <i>ispS<sub>E.g.</sub></i> * integrated at NSII | This work |

|                       |                                                                                                                                         |                      |
|-----------------------|-----------------------------------------------------------------------------------------------------------------------------------------|----------------------|
| SE23                  | $P_{\text{trc}} \text{isp}S_{E.g.} * dxs$ integrated at NSII                                                                            | This work            |
| SE24                  | $P_{\text{trc}} \text{isp}S_{E.g.} * \text{idi}_{S.e.}$ integrated at NSII                                                              | This work            |
| SE25                  | $P_{\text{trc}} \text{isp}S_{E.g.} * \text{idi}_{H.p.}$ integrated at NSII                                                              | This work            |
| SE26                  | $P_{\text{trc}} \text{isp}S_{E.g.} * \text{idi}_{B.s.}$ integrated at NSII                                                              | This work            |
| SE27                  | $P_{\text{trc}} \text{isp}S_{E.g.} * \text{idi}_{S.c.}$ integrated at NSII                                                              | This work            |
| SE28                  | $P_{\text{trc}} \text{isp}S_{E.g.} * \text{idi}_{S.c.} dxs$ integrated at NSII                                                          | This work            |
| SE29                  | $P_{\text{cpc}} \text{isp}S_{P.a.} * dxs$ integrated at NSII                                                                            | This work            |
| SE30                  | $P_{\text{cpc}} \text{isp}S_{P.a.} * \text{idi}_{S.c.}$ integrated at NSII                                                              | This work            |
| SE31                  | $P_{\text{cpc}} \text{isp}S_{P.a.} * \text{idi}_{S.c.}, dxs$ integrated at NSII                                                         | This work            |
| SE32                  | $P_{\text{trc}} \text{idi-GGGS-isp}S_{E.g.} * dxs$ integrated at NSII                                                                   | This work            |
| SE33                  | $P_{\text{trc}} \text{isp}S_{E.g.} * \text{-GGGS-idi}$ $dxs$ integrated at NSII                                                         | This work            |
| SE34                  | $P_{\text{cpc}} \text{idi -GGGS-isp}S_{P.a.} * dxs$ integrated at NSII                                                                  | This work            |
| SE35                  | $P_{\text{cpc}} \text{isp}S_{P.a.} * \text{-GGGS-idi}$ $dxs$ integrated at NSII                                                         | This work            |
| SE36                  | $P_{\text{cpc}} \text{idi -GSGGGGS-isp}S_{P.a.} * dxs$ integrated at NSII                                                               | This work            |
| SE37                  | $P_{\text{cpc}} \text{idi -GSGEAAAK-isp}S_{P.a.} * dxs$ integrated at NSII                                                              | This work            |
| SE38                  | $P_{\text{cpc}} \text{idi -GSG(EAAAK)}_2 \text{-isp}S_{P.a.} * dxs$ integrated at NSII                                                  | This work            |
| SE40                  | $P_{\text{trc}} \text{isp}S_{E.g.} * \text{isp}D$ integrated at NSII                                                                    | This work            |
| SE41                  | $P_{\text{trc}} \text{isp}S_{E.g.} * \text{isp}F$ integrated at NSII                                                                    | This work            |
| SE42                  | $P_{\text{trc}} \text{isp}S_{E.g.} * \text{isp}D \text{isp}F$ integrated at NSII                                                        | This work            |
| SE43                  | $P_{\text{trc}} \text{isp}S_{E.g.} * \text{idi}$ $dxs$ integrated at NSII<br>$P_{\text{tac}} \text{isp}D \text{isp}F$ integrated at NSI | This work            |
| SE51                  | $P_{\text{trc}} \text{idi-GGGS-isp}S_{E.g.} * dxs$ integrated at NSII<br>$P_{\text{tac}} \text{isp}G_{S.e.}$ integrated at NSIII        | This work            |
| SE52                  | $P_{\text{trc}} \text{idi-GGGS-isp}S_{E.g.} * dxs$ integrated at NSII<br>$P_{\text{tac}} \text{isp}G_{T.e.}$ integrated at NSIII        | This work            |
| SE53                  | $P_{\text{cpc}} \text{idi-GGGS-isp}S_{P.a.} * dxs$ integrated at NSII<br>$P_{\text{cpc}} \text{isp}G_{S.e.}$ integrated at NSIII        | This work            |
| SE54                  | $P_{\text{cpc}} \text{idi-GGGS-isp}S_{P.a.} * dxs$ integrated at NSII<br>$P_{\text{cpc}} \text{isp}G_{T.e.}$ integrated at NSIII        |                      |
| Plasmids              |                                                                                                                                         |                      |
| pBluescript KS II (+) | $\text{Amp}^r$ ; $\text{ColE1 ori}$ ; $P_{T7}$ MCS                                                                                      | Agilent Technologies |
| pCL1920               | $\text{Spec}^r$ ; SC101 ori;                                                                                                            | Ref. <sup>22</sup>   |
| pMMB66EH              | $\text{Amp}^r$ ; $P_{\text{tac}}$                                                                                                       | ATCC                 |
| pSE01                 | $\text{Spec}^r$ ; NSII targeting vector; $\text{ColE1 ori}$ ;                                                                           | This work            |
| pSE02                 | $\text{Spec}^r$ ; NSII targeting ; $P_{\text{psbA2}}$                                                                                   | This work            |
| pSE03                 | $\text{Spec}^r$ ; NSII targeting ; $P_{\text{cpc}}$                                                                                     | This work            |
| pSE04                 | $\text{Spec}^r$ ; NSII targeting ; $P_{\text{trc}}$                                                                                     | This work            |
| pSE05                 | $\text{Spec}^r$ ; NSII targeting ; $P_{\text{cpc}}$ ; containing poly-His tag                                                           | This work            |
| pSE06                 | $\text{Spec}^r$ ; NSII targeting ; $P_{\text{trc}}$ ; containing poly-His tag                                                           | This work            |
| pSE07                 | $\text{Spec}^r$ ; NSII targeting ; $P_{\text{psbA2}} \text{isp}S_{P.m.} *$                                                              | This work            |
| pSE08                 | $\text{Spec}^r$ ; NSII targeting ; $P_{\text{psbA2}} \text{isp}S_{P.t.}$                                                                | This work            |
| pSE09                 | $\text{Spec}^r$ ; NSII targeting ; $P_{\text{psbA2}} \text{isp}S_{P.d.}$                                                                | This work            |
| pSE10                 | $\text{Spec}^r$ ; NSII targeting ; $P_{\text{psbA2}} \text{isp}S_{E.g.}$                                                                | This work            |

|       |                                                                                                                      |           |
|-------|----------------------------------------------------------------------------------------------------------------------|-----------|
| pSE11 | Spec <sup>r</sup> ; NSII targeting ; $P_{\text{psbA2}} \text{isp}S_{P.a.}$                                           | This work |
| pSE12 | Spec <sup>r</sup> ; NSII targeting ; $P_{\text{psbA2}} \text{isp}S_{P.c.}$                                           | This work |
| pSE13 | Spec <sup>r</sup> ; NSII targeting ; $P_{\text{cpc}} \text{isp}S_{P.m.*}$                                            | This work |
| pSE14 | Spec <sup>r</sup> ; NSII targeting ; $P_{\text{cpc}} \text{isp}S_{P.a.}$                                             | This work |
| pSE15 | Spec <sup>r</sup> ; NSII targeting ; $P_{\text{cpc}} \text{isp}S_{P.c.}$                                             | This work |
| pSE16 | Spec <sup>r</sup> ; NSII targeting ; $P_{\text{cpc}} \text{isp}S_{E.g.}$                                             | This work |
| pSE17 | Spec <sup>r</sup> ; NSII targeting ; $P_{\text{cpc}} \text{isp}S_{P.c.*}$                                            | This work |
| pSE18 | Spec <sup>r</sup> ; NSII targeting ; $P_{\text{trc}} \text{isp}S_{P.a.}$                                             | This work |
| pSE19 | Spec <sup>r</sup> ; NSII targeting ; $P_{\text{trc}} \text{isp}S_{E.g.}$                                             | This work |
| pSE20 | Spec <sup>r</sup> ; NSII targeting ; $P_{\text{trc}} \text{isp}S_{P.c.}$                                             | This work |
| pSE21 | Spec <sup>r</sup> ; NSII targeting ; $P_{\text{trc}} \text{isp}S_{p.c.*}$                                            | This work |
| pSE22 | Spec <sup>r</sup> ; NSII targeting ; $P_{\text{trc}} \text{isp}S_{p.m.*}$                                            | This work |
| pSE23 | Spec <sup>r</sup> ; NSII targeting ; $P_{\text{cpc}} \text{isp}S_{P.a.*}$                                            | This work |
| pSE24 | Spec <sup>r</sup> ; NSII targeting ; $P_{\text{cpc}} \text{isp}S_{E.g.*}$                                            | This work |
| pSE25 | Spec <sup>r</sup> ; NSII targeting ; $P_{\text{trc}} \text{isp}S_{P.a.*}$                                            | This work |
| pSE26 | Spec <sup>r</sup> ; NSII targeting ; $P_{\text{trc}} \text{isp}S_{E.g.*}$                                            | This work |
| pSE27 | Spec <sup>r</sup> ; NSII targeting ; $P_{\text{cpc}} \text{His-tagged-isp}S_{P.a.*}$                                 | This work |
| pSE28 | Spec <sup>r</sup> ; NSII targeting ; $P_{\text{cpc}} \text{His-tagged-isp}S_{E.g.*}$                                 | This work |
| pSE29 | Spec <sup>r</sup> ; NSII targeting ; $P_{\text{trc}} \text{His-tagged-isp}S_{P.m.*}$                                 | This work |
| pSE30 | Spec <sup>r</sup> ; NSII targeting ; $P_{\text{trc}} \text{His-tagged-isp}S_{P.a.}$                                  | This work |
| pSE31 | Spec <sup>r</sup> ; NSII targeting ; $P_{\text{trc}} \text{His-tagged-isp}S_{E.g.}$                                  | This work |
| pSE32 | Spec <sup>r</sup> ; NSII targeting ; $P_{\text{trc}} \text{His-tagged-isp}S_{P.a.*}$                                 | This work |
| pSE33 | Spec <sup>r</sup> ; NSII targeting ; $P_{\text{trc}} \text{His-tagged-isp}S_{E.g.*}$                                 | This work |
| pSE34 | Spec <sup>r</sup> ; NSII targeting ; $P_{\text{trc}} \text{isp}S_{E.g.*} \text{dxs}$                                 | This work |
| pSE35 | Spec <sup>r</sup> ; NSII targeting ; $P_{\text{trc}} \text{isp}S_{E.g.*} \text{idi}_{S.e.}$                          | This work |
| pSE36 | Spec <sup>r</sup> ; NSII targeting ; $P_{\text{trc}} \text{isp}S_{E.g.*} \text{idi}_{H.p.}$                          | This work |
| pSE37 | Spec <sup>r</sup> ; NSII targeting ; $P_{\text{trc}} \text{isp}S_{E.g.*} \text{idi}_{B.a.}$                          | This work |
| pSE38 | Spec <sup>r</sup> ; NSII targeting ; $P_{\text{trc}} \text{isp}S_{E.g.*} \text{idi}_{S.c.}$                          | This work |
| pSE39 | Spec <sup>r</sup> ; NSII targeting ; $P_{\text{trc}} \text{isp}S_{E.g.*} \text{idi}_{S.c.} \text{dxs}$               | This work |
| pSE40 | Spec <sup>r</sup> ; NSII targeting ; $P_{\text{cpc}} \text{isp}S_{P.a.*} \text{dxs}$                                 | This work |
| pSE41 | Spec <sup>r</sup> ; NSII targeting ; $P_{\text{cpc}} \text{isp}S_{P.a.*} \text{idi}_{S.c.}$                          | This work |
| pSE42 | Spec <sup>r</sup> ; NSII targeting ; $P_{\text{cpc}} \text{isp}S_{P.a.*} \text{idi}_{S.c.} \text{dxs}$               | This work |
| pSE43 | Spec <sup>r</sup> ; NSII targeting ; $P_{\text{trc}} \text{idi-GGGS-isp}S_{E.g.*} \text{dxs}_{S.e.}$                 | This work |
| pSE44 | Spec <sup>r</sup> ; NSII targeting ; $P_{\text{trc}} \text{isp}S_{E.g.*} \text{-GGGS-idi} \text{dxs}_{S.e.}$         | This work |
| pSE45 | Spec <sup>r</sup> ; NSII targeting ; $P_{\text{cpc}} \text{idi-GGGS-isp}S_{P.a.*} \text{dxs}_{S.e.}$                 | This work |
| pSE46 | Spec <sup>r</sup> ; NSII targeting ; $P_{\text{cpc}} \text{isp}S_{P.a.*} \text{-GGGS-idi} \text{dxs}_{S.e.}$         | This work |
| pSE47 | Spec <sup>r</sup> ; NSII targeting ; $P_{\text{cpc}} \text{idi-GSGGGGS-isp}S_{P.a.*} \text{dxs}_{S.e.}$              | This work |
| pSE48 | Spec <sup>r</sup> ; NSII targeting ; $P_{\text{cpc}} \text{idi-GSGEAAAK-isp}S_{P.a.*} \text{dxs}_{S.e.}$             | This work |
| pSE49 | Spec <sup>r</sup> ; NSII targeting ; $P_{\text{cpc}} \text{idi-GSG(EAAAK)}_2 \text{-isp}S_{P.a.*} \text{dxs}_{S.e.}$ | This work |
| pSE53 | Kan <sup>r</sup> ; NSIII targeting vector; SC101 ori;                                                                | This work |
| pSE54 | Kan <sup>r</sup> ; NSIII targeting ; $P_{\text{tac}}$ ;                                                              | This work |
| pSE55 | Kan <sup>r</sup> ; NSIII targeting ; $P_{\text{cpc}}$ ;                                                              | This work |
| pSE56 | Kan <sup>r</sup> ; NSIII targeting ; $P_{\text{tac}} \text{isp}G_{T.e.}$                                             | This work |
| pSE57 | Kan <sup>r</sup> ; NSIII targeting ; $P_{\text{tac}} \text{isp}G_{S.e.}$                                             | This work |

---

|                                           |                                                                          |           |
|-------------------------------------------|--------------------------------------------------------------------------|-----------|
| pSE58                                     | Kan <sup>r</sup> ; NSIII targeting ; $P_{\text{cpc}} \text{isp}G_{S.e.}$ | This work |
| pSE59                                     | Kan <sup>r</sup> ; NSIII targeting ; $P_{\text{cpc}} \text{isp}G_{T.e.}$ | This work |
| pET28a- $\text{dxr}_{E.c.}$               | Kan <sup>r</sup> ; ColE1 ori; $P_{T7} \text{dxr}_{E.c.}$                 | This work |
| pET28a- $\text{idi}_{S.c.}$               | Kan <sup>r</sup> ; ColE1 ori; $P_{T7} \text{idi}_{S.c.}$                 | This work |
| pET28a- $\text{isp}S_{P.a.*}$             | Kan <sup>r</sup> ; ColE1 ori; $P_{T7} \text{isp}S_{P.a.*}$               | This work |
| pET28a-<br>$\text{idi-GGGS-isp}S_{P.a.*}$ | Kan <sup>r</sup> ; ColE1 ori; $P_{T7} \text{idi-GGGS-isp}S_{P.a.*}$      | This work |
| pET28a-<br>$\text{isp}S_{P.a.*-GGGS-idi}$ | Kan <sup>r</sup> ; ColE1 ori; $P_{T7} \text{isp}S_{P.a.*-GGGS-idi}$      | This work |
| pET28a- $\text{isp}S_{E.g.*}^*$           | Kan <sup>r</sup> ; ColE1 ori; $P_{T7} \text{isp}S_{E.g.*}$               | This work |

---

**Table S7.** Oligonucleotides used in this study.

| Name | Sequence 5' → 3'                                                                    | Used for Plasmid |
|------|-------------------------------------------------------------------------------------|------------------|
| GX1  | AGAGAGCTCGAGAACCGTTCCTGCGGATCGCTCTTA                                                | pSE01            |
| GX2  | AGAGAGGGTACCTAAGCGGGCCACGGCAGCGAAAGGG                                               | pSE01            |
| GX3  | AGAGAGGAATTCCCAGCTTGGCTGTTTTGGCGG                                                   | pSE01            |
| GX4  | AGAGAGAAGCTTAAGGCCAGTCTTTCGACTGA                                                    | pSE01            |
| GX5  | AGAGAGAAGCTTAAAAAATTGAAAAAAGTGTTTC                                                  | pSE01            |
| GX6  | AGAGAGCTCGAGATCGATTTTCGTTCTGAATAAC                                                  | pSE01            |
| GX7  | AGAGAGGAGCTCCGATCGCTTTGGGACTTGGAACGGT                                               | pSE01            |
| GX8  | AGAGAGGGATCCAAATCACCAGCTGAAACGGTGAAGT                                               | pSE01            |
| GX9  | AGAGAGGGATCCATCAGAATCCTTGCCCAGATGC                                                  | pSE02            |
| GX10 | AGAGAGGAATTCAGAGAGCATATGGTTATAATTCCTTATGTATTTG                                      | pSE02            |
| GX11 | AGAGAGGGATCCGTTATAAAATAAACTTAACAAATC                                                | pSE03, pSE05     |
| GX12 | AGAGAGGAATTCAGAGAGCATATGATTAATCTCCTACTTGACTTTATG                                    | pSE03            |
| GX13 | AGAGAGGGATCCGGTTTTTCACCGTCATCACCGAAAC                                               | pSE04, pSE06     |
| GX14 | AGAGAGGAATTCAGAGAGCATATGCTGTTTCCTGTGTGAAATTG                                        | pSE04            |
| GX15 | AGAGGAATTCAGAGCATATGGCTGTGGTGATGATGGTGATGGCTGCTGCCCATGAATTA<br>ATCTCCTACTTGACTTTATG | pSE05            |
| GX16 | AGAGGAATTCAGAGCATATGGCTGTGGTGATGATGGTGATGGCTGCTGCCCATGGTCTGT<br>TTCCTGTGTGAAATTG    | pSE06            |
| GX17 | AGAGAGTGTACAAAGAAGGAGATATAACCATGCATCTCAGCGAAATTACC                                  | pSE34, pSE40     |
| GX18 | AGAGAGGAATTCAGAGAGACTAGTTTTAAGCCGAAGCAGCACCAATC                                     | pSE34, pSE40     |
| GX19 | AGAGAGTGTACAAAGAAGGAGATATAACCATGAACTTCCCGATCGCAGCTG                                 | pSE35            |
| GX20 | AGAGAGGAATTCAGAGAGACTAGTTTAGCAGGGTCGCAAGACCCCGG                                     | pSE35            |
| GX21 | AGAGAGTGTACAAAGAAGGAGATATAACCATGACTCGAGCAGAACGAAAAAG                                | pSE37            |
| GX22 | AGAGAGGAATTCAGAGAGACTAGTTTATCGCACACTATAGCTTGATG                                     | pSE37            |



---

|      |                                                                                          |                                             |
|------|------------------------------------------------------------------------------------------|---------------------------------------------|
| GX23 | AGAGAGTGTACAAAGAAGGAGATATAACCATGACTGCCGACAACAATAGTATGC                                   | pSE38                                       |
| GX24 | AGAGAGGAATTCAGAGAGACTAGTTTATAGCATTCTATGAATTTGCC                                          | pSE38                                       |
| GX25 | AGAGAGACTAGTAAGAAGGAGATATAACCATGCATCTCAGCGAAATTACC                                       | pSE39, pSE42, pSE43, pSE44,<br>pSE45, pSE46 |
| GX26 | AGAGAGGAATTCTTAAGCCGAAGCAGCACCAATC                                                       | pSE39, pSE42, pSE43, pSE44,<br>pSE45, pSE46 |
| GX27 | AGAGCATATGACTGCCGACAACAATAGTATGC                                                         | pSE43, pSE45                                |
| GX28 | TAGCATTCTATGAATTTGCCTGTC                                                                 | pSE43, pSE45                                |
| GX29 | GACAGGCAAATTCATAGAATGCTAGGCGGTGGCTCCATGGAAGGACGACGGAGCGCC                                | pSE43                                       |
| GX30 | AGAGAGTGTACATTACGCGGCTGGACTAATCGG                                                        | pSE43                                       |
| GX31 | AGAGCATATGGAAGGACGACGGAGCGCC                                                             | pSE44                                       |
| GX32 | GCATACTATTGTTGTTCGGCAGTCATGGAGCCACCGCCCGGGCTGGACTAATCGGTTTAA<br>TG                       | pSE44                                       |
| GX33 | ATGACTGCCGACAACAATAGTATGC                                                                | pSE44, pSE46                                |
| GX34 | AGAGAGTGTACATTATAGCATTCTATGAATTTGCC                                                      | pSE44, pSE46                                |
| GX35 | GACAGGCAAATTCATAGAATGCTAGGCGGTGGCTCCATGCGATGTTCTGTTAGTACC                                | pSE45                                       |
| GX36 | AGAGAGTGTACATTAACGCTCAAAGGGTAAAATGG                                                      | pSE45                                       |
| GX37 | AGAGAGCATATGCGATGTTCTGTTAGTACC                                                           | pSE46                                       |
| GX38 | GCATACTATTGTTGTTCGGCAGTCATGGAGCCACCGCCACGCTCAAAGGGTAAAATGGGT<br>TC                       | pSE46                                       |
| GX39 | GACAGGCAAATTCATAGAATGCTAGGCTCCGGTGGCGGTGGCAGTATGCGATGTTCTGTT<br>AGTACC                   | pSE47                                       |
| GX40 | GACAGGCAAATTCATAGAATGCTAGGCTCCGGTGAAGCCGCTGCCAAAATGCGATGTT<br>TGTTAGTACC                 | pSE48                                       |
| GX41 | GACAGGCAAATTCATAGAATGCTAGGCTCCGGTGAAGCCGCTGCCAAAGAAGCCGCTG<br>CCAAAATGCGATGTTCTGTTAGTACC | pSE49                                       |

---

---

|       |                                                   |                                      |
|-------|---------------------------------------------------|--------------------------------------|
| GX50  | AGAGAGGTTCGACGGCGTTTTCTGCTACATGGGCCG              | pSE53                                |
| GX51  | AGAGAGGGATCCAGAGAGGGTACCTTAGCCGTTGATTGCAGGTGCAGTC | pSE53                                |
| GX56  | AGAGAGAGATCTTTAAGTCTCTATCTCTGCAGGAG               | pSE53                                |
| GX57  | AGAGAGGAGCTCGGAAGTCCAGCGCAATCAGCGG                | pSE53                                |
| GX58  | AGAGAGGCGGCCGCTTCGTGTCGCTCAAGGCGCAC               | pSE54                                |
| GX59  | AGAGAGGGATCCTGTTTCCTGTGTGAAATTGTTATC              | pSE54                                |
| GX60  | AGAGAGGCGGCCGCGTTATAAAATAAACTTAACAAATC            | pSE55                                |
| GX61  | AGAGAGGGATCCAATCTCCTACTTGACTTTATG                 | pSE55                                |
| GX62  | AGAGAGGGATCCATGCAGACCCTCTCCACCCCCAGC              | pSE57, pSE58                         |
| GX63  | AGAGAGCCGCGGTTAGGCAATCGGTTCCGGTTC                 | pSE57, pSE58                         |
| GX89  | AGAGAGCATATGAAGCAACTCACCATTCTG                    | pET28a- <i>dxr</i> <sub>E.c.</sub>   |
| GX90  | AGAGAGGTCTGACTTAGCTTGCGAGACGCATCACC               | pET28a- <i>dxr</i> <sub>E.c.</sub>   |
| GX91  | AGAGCATATGACTGCCGACAACAATAGTATGC                  | pET28a- <i>idi</i> <sub>S.c.</sub>   |
| GX92  | AGAGAGGGATCCTTATAGCATTCTATGAATTTGC                | pET28a- <i>idi</i> <sub>S.c.</sub>   |
| GX93  | AGAGAGCATATGCGATGTTCTGTTAGTACC                    | pET28a- <i>ispS</i> <sub>P.a.*</sub> |
| GX94  | AGAGAGGGATCCTTAACGCTCAAAGGGTAAAATGG               | pET28a- <i>ispS</i> <sub>P.a.*</sub> |
| GX95  | AGAGCATATGGAAGGACGACGGAGCGCC                      | pET28a- <i>ispS</i> <sub>E.g.*</sub> |
| GX96  | AGAGGGATCCTTACGCGGCTGGACTAATC                     | pET28a- <i>ispS</i> <sub>E.g.*</sub> |
| GX100 | GTGATGGTGTGCTTGTGATAGC                            | NSII validate                        |
| GX101 | ATGCTGTGGAGTTATCTTTTGGC                           | NSII validate                        |
| GX104 | CGGCTGATGCGGAACAGCTAG                             | NSIII validate                       |
| GX105 | GATGAGAAATTCGAGGTTCTTGC                           | NSIII validate                       |

---

**Table S8.** Extracellular concentrations of metabolites quantified by GC-MS\*

| Metabolites             | Extracellular concentration ( $\mu\text{M}$ ) |                |                | Limit of detection ( $\mu\text{M}$ ) |
|-------------------------|-----------------------------------------------|----------------|----------------|--------------------------------------|
|                         | WT                                            | SE52           | SE54           |                                      |
| Pyruvate                | NA <sup>b</sup>                               | NA             | NA             | 1.5                                  |
| Lactate                 | NA                                            | NA             | NA             | 3.3                                  |
| Fumarate                | NA                                            | NA             | NA             | 2.0                                  |
| Succinate               | $6.1 \pm 0.1$                                 | $5.7 \pm 0.2$  | $6.0 \pm 0.1$  | 1.5                                  |
| Malate                  | NA                                            | NA             | NA             | 2.0                                  |
| $\alpha$ -Ketoglutarate | NA                                            | NA             | NA             | 2.0                                  |
| Citrate                 | $13.7 \pm 0.3$                                | $14.2 \pm 0.4$ | $14.8 \pm 0.2$ | 1.1                                  |
| Isocitrate              | NA                                            | NA             | NA             | 1.7                                  |
| Glycolate               | NA                                            | $8.8 \pm 0.1$  | $9.4 \pm 0.3$  | 5.3                                  |

\*For analysis of extracellular metabolites, culture samples (1.5 mL) were harvested by centrifugation. The supernatant was dried in a vacuum centrifuge at room temperature. After redissolved with  $50 \mu\text{L}$  of  $20 \text{ mg mL}^{-1}$  methoxyamine hydrochloride in pyridine, the sample was incubated at  $30 \text{ }^\circ\text{C}$  for 60 min and then derivatized at  $70 \text{ }^\circ\text{C}$  for 30 min in  $50 \mu\text{L}$  pyridine and  $50 \mu\text{L}$  *N*-methyl-*N*-[*tert*-butyldimethylsilyl] trifluoroacetamide (Sigma). The GC-MS analysis was performed as described previously.<sup>23</sup> NA, not detectable.

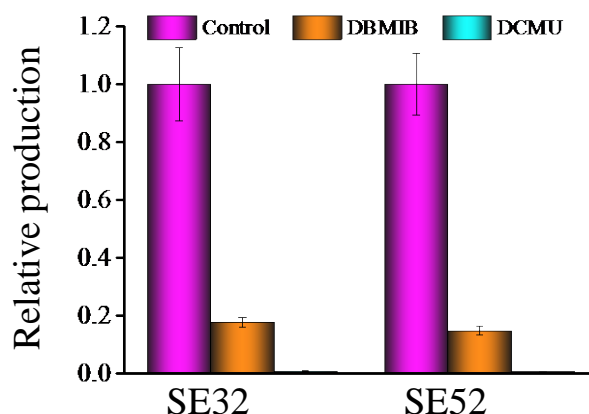

**Fig. S1.** Effect of treatment with DBMIB and DCMU on isoprene production of strains SE32 and SE52. DCMU ( $10 \mu\text{M}$ ) or DBMIB ( $10 \mu\text{M}$ ) was added to the shake flask cultures when  $\text{OD}_{730}$  reaches about 0.8, and then the cells were cultivated at  $30 \text{ }^\circ\text{C}$  for 24 h. Data are normalized to the isoprene production in the absence of DBMIB or DCMU. Error bars indicate s.d. ( $n = 3$ ).

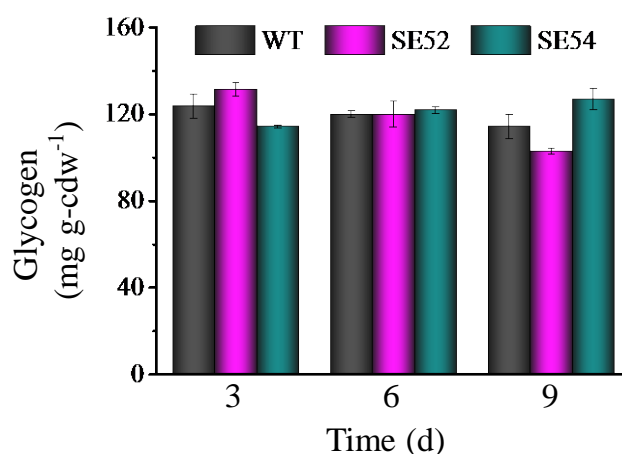

**Fig. S2.** Intracellular glycogen contents in *S. elongatus* wild type, SE52, and SE53 strains during long-term continuous production of isoprene. Samples were taken at 3, 6, and 9 d. Glycogen content was measured as described previously.<sup>24</sup> Error bars indicate s.d. ( $n = 3$ ).

## References

- 1 R. E. Reinsvold, R. E. Jinkerson, R. Radakovits, M. C. Posewitz and C. Basu, *J. Plant Physiol.*, 2011, **168**, 848-852.
- 2 F. K. Bentley, J. G. Garcia-Cerdan, H.-C. Chen and A. Melis, *Bioenerg. Res.*, 2013, **6**, 917-929.
- 3 C. Halfmann, L. Gu, W. Gibbons and R. Zhou, *Appl. Microbiol. Biotechnol.*, 2014, **98**, 9869-9877.
- 4 F. K. Davies, V. H. Work, A. S. Beliaev and M. C. Posewitz, *Front. Bioeng. Biotechnol.*, 2014, **2**, 21-21.
- 5 F. K. Bentley and A. Melis, *Biotechnol. Bioeng.*, 2012, **109**, 100-109.
- 6 D. C. Ducat, J. A. Avelar-Rivas, J. C. Way and P. A. Silver, *Appl. Environ. Microbiol.*, 2012, **78**, 2660-2668.
- 7 J. W. K. Oliver, I. M. P. Machado, H. Yoneda and S. Atsumi, *Proc. Natl. Acad. Sci. USA*, 2013, **110**, 1249-1254.
- 8 Z. Gao, H. Zhao, Z. Li, X. Tan and X. Lu, *Energy Environ. Sci.*, 2012, **5**, 9857-9865.
- 9 S. Atsumi, W. Higashide and J. C. Liao, *Nat. Biotechnol.*, 2009, **27**, 1177-1180.
- 10 X. Liu, J. Sheng and R. Curtiss, III, *Proc. Natl. Acad. Sci. USA*, 2011, **108**, 6899-6904.
- 11 J. Ungerer, L. Tao, M. Davis, M. Ghirardi, P.-C. Maness and J. Yu, *Energy Environ. Sci.*, 2012, **5**, 8998-9006.
- 12 J. H. Jacobsen and N.-U. Frigaard, *Metab. Eng.*, 2014, **21**, 60-70.
- 13 S. A. Angermayr, A. D. van der Woude, D. Correddu, A. Vreugdenhil, V. Verrone and K. J. Hellingwerf, *Biotechnol Biofuels.*, 2014, **7**.
- 14 E. I. Lan, S. Y. Ro and J. C. Liao, *Energy Environ. Sci.*, 2013, **6**, 2672-2681.

- 15 B. Wang, S. Pugh, D. R. Nielsen, W. Zhang and D. R. Meldrum, *Metab. Eng.*, 2013, **16**, 68-77.
- 16 C. R. Shen and J. C. Liao, *Energy Environ. Sci.*, 2012, **5**, 9574-9583.
- 17 H. Li and J. C. Liao, *Microbial Cell Factories*, 2013, **12**.
- 18 J. Zhou, H. Zhang, Y. Zhang, Y. Li and Y. Ma, *Metab. Eng.*, 2012, **14**, 394-400.
- 19 T. Kusakabe, T. Tatsuke, K. Tsuruno, Y. Hirokawa, S. Atsumi, J. C. Liao and T. Hanai, *Metab. Eng.*, 2013, **20**, 101-108.
- 20 W. Wang, X. Liu and X. Lu, *Biotechnol Biofuels.*, 2013, **6**.
- 21 X. Tan, L. Yao, Q. Gao, W. Wang, F. Qi and X. Lu, *Metab. Eng.*, 2011, **13**, 169-176.
- 22 C. G. Lerner and M. Inouye, *Nucleic Acids Res.*, 1990, **18**, 4631-4631.
- 23 L. Liu, L. Zhang, W. Tang, Y. Gu, Q. Hua, S. Yang, W. Jiang and C. Yang, *J. Bacteriol.*, 2012, **194**, 5413-5422.
- 24 D. Liu and C. Yang, *J. Biol. Chem.*, 2014, **289**, 2055-2071.
